# Supplementary material for: Effective removal of inorganic and organic heavy metal pollutants with poly(amino acid)-based micromotors
Source: Royal Society of Chemistry journal article supplement (doi:10.1039/c9nr09813e), 2020-01-01
Supplement: c9nr09813e3.pdf [file c9nr09813e3.pdf]

## Effective Removal of Inorganic and Organic Heavy Metal Pollutants with Poly(Amino Acid)-Based Micromotors

Ting Hou,<sup>‡a</sup> Shanshan Yu,<sup>‡a</sup> Minfeng Zhou,<sup>a</sup> Min Wu,<sup>a</sup> Jie Liu,<sup>a</sup> Xiaoli Zheng,<sup>a</sup> Jinxing Li,<sup>\*b</sup>  
Joseph Wang,<sup>b</sup> and Xiaolei Wang<sup>\*a</sup>

<sup>a</sup> College of Chemistry, Chemical Engineering and Materials Science, Collaborative Innovation Center of Functionalized Probes for Chemical Imaging in Universities of Shandong, Key Laboratory of Molecular and Nano Probes, Ministry of Education, Institute of Molecular and Nano Science, Shandong Normal University, Jinan 250014, P. R. China

<sup>b</sup> Department of Nanoengineering, University of California, San Diego, La Jolla, California 92093, United States

### Supporting Information

Fig. 1S

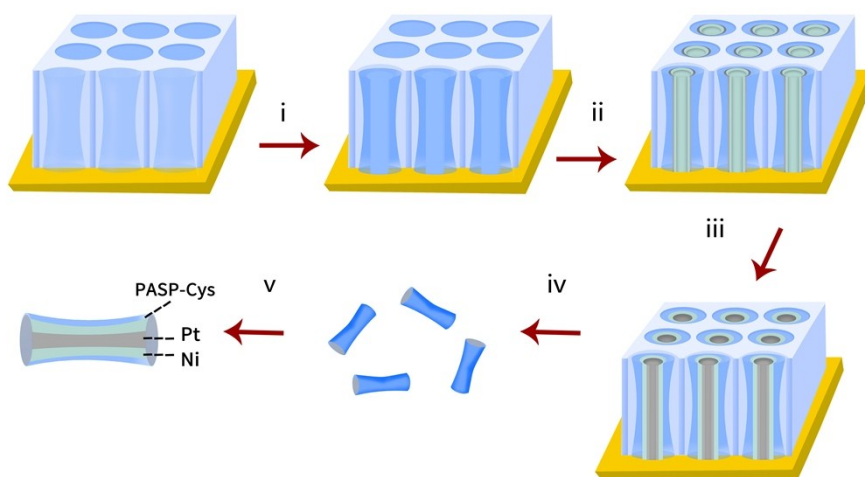

**Fig. 1S.** Preparation process of PAsp-Cys/Ni/Pt micromotors.
